# Supplementary material for: Field Application of Spent Lime Water Treatment Residual for the Removal of Phosphorus and other Pollutants in Urban Stormwater Runoff
Source: MDPI journal article supplement (doi:10.3390/w14132135), 2022-07-04
Supplement: s1 [file s1]

**Table S1.** Summary data from all sampled storm events. Numbers in red text represent parameters which were reported as not detected, in which case the value represents half of the detection limit.

| Storm Event | Start Date/Time | End Date/Time | Duration (hr) | Storm Event Flow (m <sup>3</sup> ) | Max Flow Rate (L/s) | Avg # Inf/Eff Samples | Contact Time (min) | Cumulative Flow (cf) |
|-------------|-----------------|---------------|---------------|------------------------------------|---------------------|-----------------------|--------------------|----------------------|
| 1           | 5/19/12 19:50   | 5/19/12 20:50 | 1.0           | 21.4                               | 20.1                | 8.5                   | N/A                | 18,911               |
| 2           | 6/17/12 23:40   | 6/18/12 1:30  | 1.8           | 31.3                               | 19.3                | 9.5                   | 4.8                | 38,529               |
| 3           | 5/18/13 7:00    | 5/19/13 16:00 | 33.0          | 89.4                               | 18.7                | 19                    | 1.2                | 55,367               |
| 4           | 6/12/13 9:30    | 6/12/13 12:20 | 2.8           | 32.9                               | 4.9                 | 8.5                   | 11.9               | 61,975               |
| 5           | 6/15/13 15:40   | 6/15/13 16:50 | 1.2           | 60.8                               | 39.6                | 18.5                  | 6.6                | 63,728               |
| 6           | 6/21/13 2:50    | 6/21/13 6:20  | 3.5           | 69.7                               | 23.9                | 20                    | 7.6                | 66,384               |
| 7           | 6/21/13 20:00   | 6/21/13 20:50 | 0.8           | 77.6                               | 55.2                | 14                    | 3.5                | 68,803               |
| 8           | 6/29/13 3:10    | 6/29/13 5:50  | 2.7           | 53.3                               | 45.1                | 16.5                  | 5.5                | 72,846               |
| 9           | 7/13/13 4:10    | 7/13/13 7:30  | 3.3           | 45.4                               | 11.8                | 14.5                  | 10.8               | 75,969               |
| 10          | 8/5/13 2:30     | 8/5/13 4:20   | 1.8           | 16.8                               | 3.9                 | 6.5                   | 9.9                | 78,578               |
| 11          | 10/2/13 19:50   | 10/3/13 1:10  | 5.3           | 31.3                               | 5.4                 | 12                    | 6.6                | 84,205               |
| 12          | 5/8/14 7:50     | 5/8/14 16:50  | 9.0           | 10.2                               | 5.6                 | 3                     | 15.3               | 87,974               |
| 13          | 5/11/14 22:00   | 5/12/14 2:10  | 4.2           | 26.4                               | 5.4                 | 9                     | 18.3               | 88,599               |
| 14          | 5/19/14 10:50   | 5/19/14 15:00 | 4.2           | 74.0                               | 19.7                | 22.5                  | 12.3               | 89,892               |
| 15          | 5/31/14 13:30   | 6/1/14 6:00   | 16.5          | 76.7                               | 39.6                | 16.5                  | 11.8               | 93,947               |
| 16          | 6/7/14 8:00     | 6/7/14 11:20  | 3.3           | 28.7                               | 15.1                | 9                     | 16.0               | 98,344               |
| 17          | 6/14/14 14:30   | 6/15/14 5:30  | 15.0          | 46.3                               | 6.0                 | 12.5                  | 19.7               | 99,619               |
| 18          | 6/16/14 17:10   | 6/16/14 20:40 | 3.5           | 28.5                               | 4.8                 | 2.5                   | 31.4               | 101,461              |
| 19          | 6/18/14 2:20    | 6/19/14 4:50  | 26.5          | 163.2                              | 37.3                | 24                    | 11.2               | 102,896              |
| 20          | 5/7/15 18:00    | 5/7/15 18:50  | 0.8           | 10.2                               | 8.9                 | 3.5                   | N/A                | 121,097              |
| 21          | 5/10/15 20:00   | 5/11/15 1:00  | 5.0           | 22.8                               | 8.1                 | 9                     | N/A                | 121,336              |
| 22          | 5/17/15 14:40   | 5/17/15 17:20 | 2.7           | 20.8                               | 7.2                 | 9                     | N/A                | 122,607              |
| 23          | 5/29/15 3:50    | 5/29/15 5:30  | 1.7           | 16.4                               | 4.8                 | 8                     | N/A                | 125,784              |
| 24          | 6/3/15 12:50    | 6/3/15 21:10  | 8.3           | 23.3                               | 10.5                | 9.5                   | N/A                | 126,706              |
| 25          | 6/6/15 23:50    | 6/7/15 1:50   | 2.0           | 41.3                               | 22.0                | 15                    | N/A                | 127,528              |
| 26          | 6/17/15 14:00   | 6/17/15 16:20 | 2.3           | 43.4                               | 27.6                | 15                    | N/A                | 129,367              |
| 27          | 6/26/15 16:30   | 6/28/15 16:50 | 48.3          | 46.3                               | 18.9                | 20.5                  | N/A                | 132,150              |
| 28          | 7/6/15 1:00     | 7/6/15 6:30   | 5.5           | 78.3                               | 18.1                | 24                    | N/A                | 133,996              |
| 29          | 7/28/15 6:40    | 7/28/15 8:40  | 2.0           | 18.4                               | 8.1                 | 8                     | N/A                | 144,166              |
| 30          | 8/6/15 16:20    | 8/7/15 3:00   | 10.7          | 25.4                               | 18.8                | 14                    | N/A                | 144,897              |
| 31          | 8/7/15 11:50    | 8/7/15 12:40  | 0.8           | 13.1                               | 19.9                | 5.5                   | N/A                | 145,767              |
| 32          | 8/18/15 10:50   | 8/18/15 15:30 | 4.7           | 32.6                               | 6.7                 | 15                    | N/A                | 146,825              |
| 33          | 8/22/15 18:30   | 8/22/15 22:10 | 3.7           | 55.8                               | 36.0                | 22                    | N/A                | 148,222              |
| 34          | 9/2/15 2:50     | 9/2/15 7:40   | 4.8           | 12.1                               | 4.2                 | 4.5                   | N/A                | 150,610              |
| 35          | 9/6/15 6:50     | 9/8/15 6:10   | 47.3          | 30.9                               | 7.9                 | 13                    | N/A                | 151,087              |
| 36          | 9/9/15 21:20    | 9/9/15 23:00  | 1.7           | 11.6                               | 6.7                 | 5                     | N/A                | 152,247              |
| 37          | 9/16/15 22:00   | 9/17/15 8:40  | 10.7          | 98.6                               | 29.7                | 24                    | N/A                | 152,707              |
| 38          | 9/23/15 14:10   | 9/24/15 7:30  | 17.3          | 41.7                               | 39.8                | 18.5                  | N/A                | 161,719              |
| 39          | 10/8/15 3:50    | 10/8/15 5:20  | 1.5           | 7.2                                | 2.6                 | 4                     | N/A                | 163,528              |
| 40          | 5/25/16 10:00   | 5/26/16 4:30  | 18.5          | 11.6                               | 4.3                 | 4.5                   | N/A                | 166,098              |
| 41          | 6/14/16 12:40   | 6/14/16 21:00 | 8.3           | 69.3                               | 24.6                | 20.5                  | N/A                | 169,794              |
| 42          | 7/23/16 11:10   | 7/23/16 17:50 | 6.7           | 63.4                               | 25.7                | 19.5                  | N/A                | 172,574              |
| 43          | 8/4/16 7:20     | 8/4/16 9:50   | 2.5           | 44.5                               | 32.0                | 18                    | N/A                | 175,848              |

Table S1 (continued).

| Storm Event | TP In (mg/L) | Dissolved P In (mg/L) | DRP In (mg P/L) | Chloride In (mg/L) | TSS In (mg/L) | TP Out (mg/L) | Dissolved P Out (mg/L) | DRP Out (mg P/L) | Chloride Out (mg/L) | TSS Out (mg/L) |
|-------------|--------------|-----------------------|-----------------|--------------------|---------------|---------------|------------------------|------------------|---------------------|----------------|
| 1           | 0.360        | 0.300                 | 0.210           | no data            | 34.8          | 0.160         | 0.014                  | 0.010            | no data             | 37.8           |
| 2           | 0.150        | 0.014                 | 0.038           | no data            | 40.3          | 0.014         | 0.014                  | 0.010            | no data             | 17.7           |
| 3           | 0.98         | 0.34                  | 0.26            | 6.3                | 160           | 0.081         | 0.015                  | 0.010            | 9.6                 | 21             |
| 4           | 0.29         | no data               | 0.1             | 2.9                | 58            | 0.049         | no data                | 0.014            | 4                   | 8.5            |
| 5           | 0.49         | 0.082                 | 0.061           | 1.1                | 350           | 0.21          | 0.049                  | 0.034            | 2.1                 | 150            |
| 6           | 0.49         | 0.13                  | 0.16            | 2.2                | 170           | 0.18          | 0.019                  | 0.046            | 4.9                 | 78             |
| 7           | 0.38         | 0.09                  | 0.09            | 2.8                | 200           | 0.31          | 0.091                  | 0.048            | 2.2                 | 180            |
| 8           | 0.12         | 0.063                 | 0.048           | 0.42               | 110           | 0.11          | 0.055                  | 0.036            | 3.5                 | 48             |
| 9           | 0.16         | 0.085                 | 0.073           | 3.3                | 18            | 0.056         | 0.034                  | 0.024            | 3.5                 | 16             |
| 10          | 0.29         | 0.12                  | 0.15            | 2.9                | 70            | 0.081         | 0.02                   | 0.015            | 22                  | 9.5            |
| 11          | 0.68         | 0.22                  | 0.34            | 3                  | 190           | 0.063         | 0.015                  | 0.032            | 3                   | 4              |
| 12          | no data      | no data               | no data         | no data            | no data       | no data       | no data                | no data          | no data             | no data        |
| 13          | no data      | no data               | no data         | no data            | no data       | no data       | no data                | no data          | no data             | no data        |
| 14          | no data      | no data               | no data         | no data            | no data       | no data       | no data                | no data          | no data             | no data        |
| 15          | no data      | no data               | no data         | no data            | no data       | no data       | no data                | no data          | no data             | no data        |
| 16          | no data      | no data               | no data         | no data            | no data       | no data       | no data                | no data          | no data             | no data        |
| 17          | no data      | no data               | no data         | no data            | no data       | no data       | no data                | no data          | no data             | no data        |
| 18          | no data      | no data               | no data         | no data            | no data       | no data       | no data                | no data          | no data             | no data        |
| 19          | no data      | no data               | no data         | no data            | no data       | no data       | no data                | no data          | no data             | no data        |
| 20          | 0.740        | no data               | 0.180           | 9.8                | 306           | 0.140         | no data                | 0.001            | 48.7                | 27             |
| 21          | 0.380        | no data               | 0.070           | 14.1               | 94            | 0.070         | no data                | 0.026            | 18.8                | 5              |
| 22          | 0.400        | no data               | 0.011           | 7.8                | 179           | 0.088         | no data                | 0.001            | 17.8                | 16             |
| 23          | 0.370        | no data               | 0.170           | 7.2                | 80            | 0.064         | no data                | 0.032            | 13.7                | 7              |
| 24          | 0.760        | no data               | 0.220           | 10.4               | 232           | 0.070         | no data                | 0.001            | 13.2                | 14             |
| 25          | 0.270        | no data               | 0.093           | 5.4                | 67            | 0.110         | no data                | 0.030            | 5.5                 | 19             |
| 26          | 0.220        | no data               | 0.080           | 8.9                | 40            | 0.110         | no data                | 0.035            | 5.1                 | 28             |
| 27          | 0.210        | no data               | 0.068           | 4.3                | 49            | 0.050         | no data                | 0.005            | 4.4                 | 15             |
| 28          | 0.170        | no data               | 0.110           | 3.1                | 15            | 0.046         | no data                | 0.004            | 4.5                 | 7              |
| 29          | 0.460        | no data               | 0.250           | 6.1                | 39            | 0.041         | no data                | 0.039            | 5.7                 | 7              |
| 30          | 0.220        | no data               | 0.160           | 2.6                | 33            | 0.054         | no data                | 0.032            | 3.4                 | 5              |
| 31          | 0.160        | no data               | 0.081           | 28.9               | 12            | 0.079         | no data                | 0.021            | 17.8                | 20             |
| 32          | 0.096        | no data               | 0.032           | 5.8                | 20            | 0.029         | no data                | 0.024            | 3.7                 | 5              |
| 33          | 0.130        | no data               | 0.065           | 1.5                | 37            | 0.061         | no data                | 0.024            | 1.6                 | 23             |
| 34          | 0.390        | no data               | 0.190           | 12.8               | 36            | 0.074         | no data                | 0.030            | 9.0                 | 5              |
| 35          | 0.410        | no data               | 0.280           | 4.0                | 34            | 0.038         | no data                | 0.016            | 3.5                 | 5              |
| 36          | 0.200        | no data               | 0.075           | 2.8                | 22            | 0.046         | no data                | 0.014            | 2.5                 | 5              |
| 37          | 0.170        | no data               | 0.110           | 1.6                | 55            | 0.063         | no data                | 0.025            | 2.7                 | 36             |
| 38          | 0.150        | no data               | 0.065           | 3.0                | 21            | 0.085         | no data                | 0.024            | 2.3                 | 33             |
| 39          | 1.000        | no data               | 0.500           | 8.7                | 37            | 0.055         | no data                | 0.001            | 9.5                 | 8              |
| 40          | 2.7          | no data               | 0.71            | 17.4               | 88            | 0.71          | no data                | 0.001            | 58.1                | 24             |
| 41          | 0.18         | no data               | 0.065           | 1                  | 62            | 0.1           | no data                | 0.034            | 2                   | 34             |
| 42          | 0.52         | no data               | 0.066           | 2.1                | 38.7          | 0.11          | no data                | 0.044            | 2                   | 24             |
| 43          | 0.14         | no data               | 0.082           | 1                  | 36            | 0.11          | no data                | 0.064            | 5.8                 | 15             |

Table S1 (continued).

[illegible]
